# Supplementary material for: Trends in prevalence of esophageal adenocarcinoma: Findings from a statewide database of over 6 million patients
Source: PubMed Central journal article supplement — Endosc Int Open. 2024 Feb 15;12(2):E218–26. doi: 10.1055/a-2221-7974 (PMC10869210; doi:10.1055/a-2221-7974), 2024-02-15
Supplement: 10-1055-a-2221-7974_22274674.pdf.pdf [file 10-1055-a-2221-7974_22274674.pdf.pdf]

## Supplementary material

## Appendix 1 Codes and definitions.

| Code           | Codes System | Meaning                                                                                                                                                                           |
|----------------|--------------|-----------------------------------------------------------------------------------------------------------------------------------------------------------------------------------|
| <b>k22.7</b>   | ICD-10       | Barrett's esophagus                                                                                                                                                               |
| <b>k22.71</b>  | ICD-10       | Barrett's esophagus with dysplasia                                                                                                                                                |
| <b>K22.710</b> | ICD-10       | Barrett's esophagus with low-grade dysplasia                                                                                                                                      |
| <b>k22.711</b> | ICD-10       | Barrett's esophagus with high-grade dysplasia                                                                                                                                     |
| <b>k22.719</b> | ICD-10       | Barrett's esophagus dysplasia unspecified                                                                                                                                         |
| <b>530.85</b>  | ICD-9        | Barrett's esophagus                                                                                                                                                               |
| <b>C15</b>     | ICD-10       | Malignant neoplasm of esophagus                                                                                                                                                   |
| <b>C15.4</b>   | ICD-10       | Malignant neoplasm of middle third of esophagus                                                                                                                                   |
| <b>C15.5</b>   | ICD-10       | Malignant neoplasm of lower third of esophagus                                                                                                                                    |
| <b>C15.8</b>   | ICD-10       | Malignant neoplasm of overlapping sites of esophagus                                                                                                                              |
| <b>C15.9</b>   | ICD-10       | Malignant neoplasm of esophagus, unspecified site                                                                                                                                 |
| <b>150.2</b>   | ICD-9        | Malignant neoplasm of abdominal esophagus                                                                                                                                         |
| <b>150.4</b>   | ICD-9        | Malignant neoplasm of middle third of esophagus                                                                                                                                   |
| <b>150.5</b>   | ICD-9        | Malignant neoplasm of lower third of esophagus                                                                                                                                    |
| <b>150.9</b>   | ICD-9        | Malignant neoplasm of esophagus, unspecified site                                                                                                                                 |
| <b>530.81</b>  | ICD-9        | Esophageal reflux                                                                                                                                                                 |
| <b>K21</b>     | ICD-10       | Gastro-esophageal reflux disease                                                                                                                                                  |
| <b>K22.0</b>   | ICD-10       | Gastro-esophageal reflux disease without esophagitis                                                                                                                              |
| <b>K22.9</b>   | ICD-10       | Gastro-esophageal reflux disease with esophagitis                                                                                                                                 |
| <b>43197</b>   | CPT          | Esophagoscopy flex dx brush                                                                                                                                                       |
| <b>43198</b>   | CPT          | Esophagoscopy flex transnasal biopsy                                                                                                                                              |
| <b>43200</b>   | CPT          | Esophagoscopy flexible brush                                                                                                                                                      |
| <b>43201</b>   | CPT          | Esophagoscopy with submucosal injection                                                                                                                                           |
| <b>43202</b>   | CPT          | Esophagoscopy flex biopsy                                                                                                                                                         |
| <b>43235</b>   | CPT          | Egd diagnostic brush wash                                                                                                                                                         |
| <b>43239</b>   | CPT          | Esophagogastroduodenoscopy, flexible, transoral; biopsy; single or multiple                                                                                                       |
| <b>43254</b>   | CPT          | Esophagogastroduodenoscopy, flexible, transoral; with EMR (endoscopic mucosal resection)                                                                                          |
| <b>43270</b>   | CPT          | Esophagogastroduodenoscopy, flexible, transoral; with ablation of tumor(s), polyp(s), or other lesion(s) (includes pre- and post-dilation and guide wire passage, when performed) |
| <b>43236</b>   | CPT          | Esophagogastroduodenoscopy, flexible, transoral; with directed submucosal injection(s), any substance                                                                             |

## Supplementary material

|       |     |                                                                                                                                                                                                        |
|-------|-----|--------------------------------------------------------------------------------------------------------------------------------------------------------------------------------------------------------|
| 43243 | CPT | Esophagogastroduodenoscopy, flexible, transoral; injection sclerosis of esophageal/gastric varices                                                                                                     |
| 43244 | CPT | Esophagogastroduodenoscopy, flexible, transoral; band ligation of esophageal/gastric varices                                                                                                           |
| 43245 | CPT | Esophagogastroduodenoscopy, flexible, transoral; with dilation of gastric/duodenal stricture(s) (eg, balloon, bougie)                                                                                  |
| 43247 | CPT | Esophagogastroduodenoscopy, flexible, transoral; with removal of foreign body(s)                                                                                                                       |
| 43248 | CPT | Esophagogastroduodenoscopy, flexible, transoral; insertion of guide wire followed by passage of dilator(s) through esophagus over guide                                                                |
| 43249 | CPT | Esophagogastroduodenoscopy, flexible, transoral; transendoscopic balloon dilation of esophagus (<30 mm)                                                                                                |
| 43233 | CPT | Esophagogastroduodenoscopy, flexible, transoral; with dilation of esophagus with balloon (30 mm diameter or larger) (includes fluoroscopic guidance, when performed)                                   |
| 43250 | CPT | Esophagogastroduodenoscopy, flexible, transoral; with removal of tumor(s), polyp(s), or other lesion(s) by hot biopsy forceps                                                                          |
| 43251 | CPT | Esophagogastroduodenoscopy, flexible, transoral; with removal of tumor(s), polyp(s), or other lesion(s) by snare technique                                                                             |
| 43252 | CPT | Esophagogastroduodenoscopy, flexible, transoral; with optical endomicroscopy                                                                                                                           |
| 43255 |     | Esophagogastroduodenoscopy, flexible, transoral; with control of bleeding, any method                                                                                                                  |
| 43257 | CPT | Esophagogastroduodenoscopy, flexible, transoral; with delivery of thermal energy to the muscle of lower esophageal sphincter and/or gastric cardia, for treatment of gastroesophageal reflux disease 4 |

## Supplementary material

**Appendix 2** Cox proportional Hazards Model of the predictors of incident diagnosis of esophageal cancer in the 6,024,498 Floridian population.

| Characteristic  | HR (95% CI)      | p-value |
|-----------------|------------------|---------|
| <b>Age</b>      |                  |         |
| 45–64 vs <45    | 0.04 (0.03,0.06) | <0.001  |
| >=65 vs <45     | 0.5 (0.5,0.6)    | <0.001  |
| <b>Gender</b>   |                  |         |
| Male vs Female  | 0.2 (0.2,0.2)    | <0.001  |
| <b>Race</b>     |                  |         |
| NHB vs NHW      | 0.4 (0.3,0.5)    | <0.001  |
| Hispanic vs NHW | 0.6 (0.5,0.7)    | <0.001  |
| NHO vs NHW      | 0.5 (0.4,0.7)    | <0.001  |
| <b>GERD</b>     |                  |         |
| Yes vs No       | 0.2 (0.1,0.2)    | <0.001  |
| <b>PPI</b>      |                  |         |
| Yes vs No       | 0.5 (0.4,0.6)    | <0.001  |

NHW: non-Hispanic white; NHB: non-Hispanic black; NHO: non-Hispanic white.

## Supplementary material

**Appendix 3: Cox proportional Hazards Model of the predictors of incident diagnosis of Barrett's esophagus in the population**

| Characteristic  | HR (95% CI)    | p-value |
|-----------------|----------------|---------|
| <b>Age</b>      |                |         |
| 45-64 vs <45    | 0.2(0.2,0.2)   | <0.001  |
| >=65 vs <45     | 0.8(0.8,0.8)   | <0.001  |
| <b>Gender</b>   |                |         |
| Male vs Female  | 0.6 (0.6,0.6)  | <0.001  |
| <b>Race</b>     |                |         |
| NHB vs NHW      | 0.3 (0.3,0.3)  | <0.001  |
| Hispanic vs NHW | 0.6 (0.5,0.60) | <0.001  |
| NHO vs NHW      | 0.7 (0.7,0.7)  | <0.001  |
| <b>Gerd</b>     |                |         |
| Yes vs No       | 0.1 (0.1,0.1)  | <0.001  |
| <b>PPI</b>      |                |         |
| Yes vs No       | 0.6 (0.6,0.6)  | <0.001  |

NHW, non-Hispanic white; NHB, non-Hispanic black; NHO, non-Hispanic Other; GERD, gastroesophageal reflux disease; PPI, proton pump inhibitor.
